# Supplementary material
Source: publisher site journal article supplement (https://www.dovepress.com/article/443305)
Supplement: Supplementary file 1 [file get_supplementary_file.php]

Supplementary Material

**Supplementary Figures and Tables**

## Supplementary Figures

**
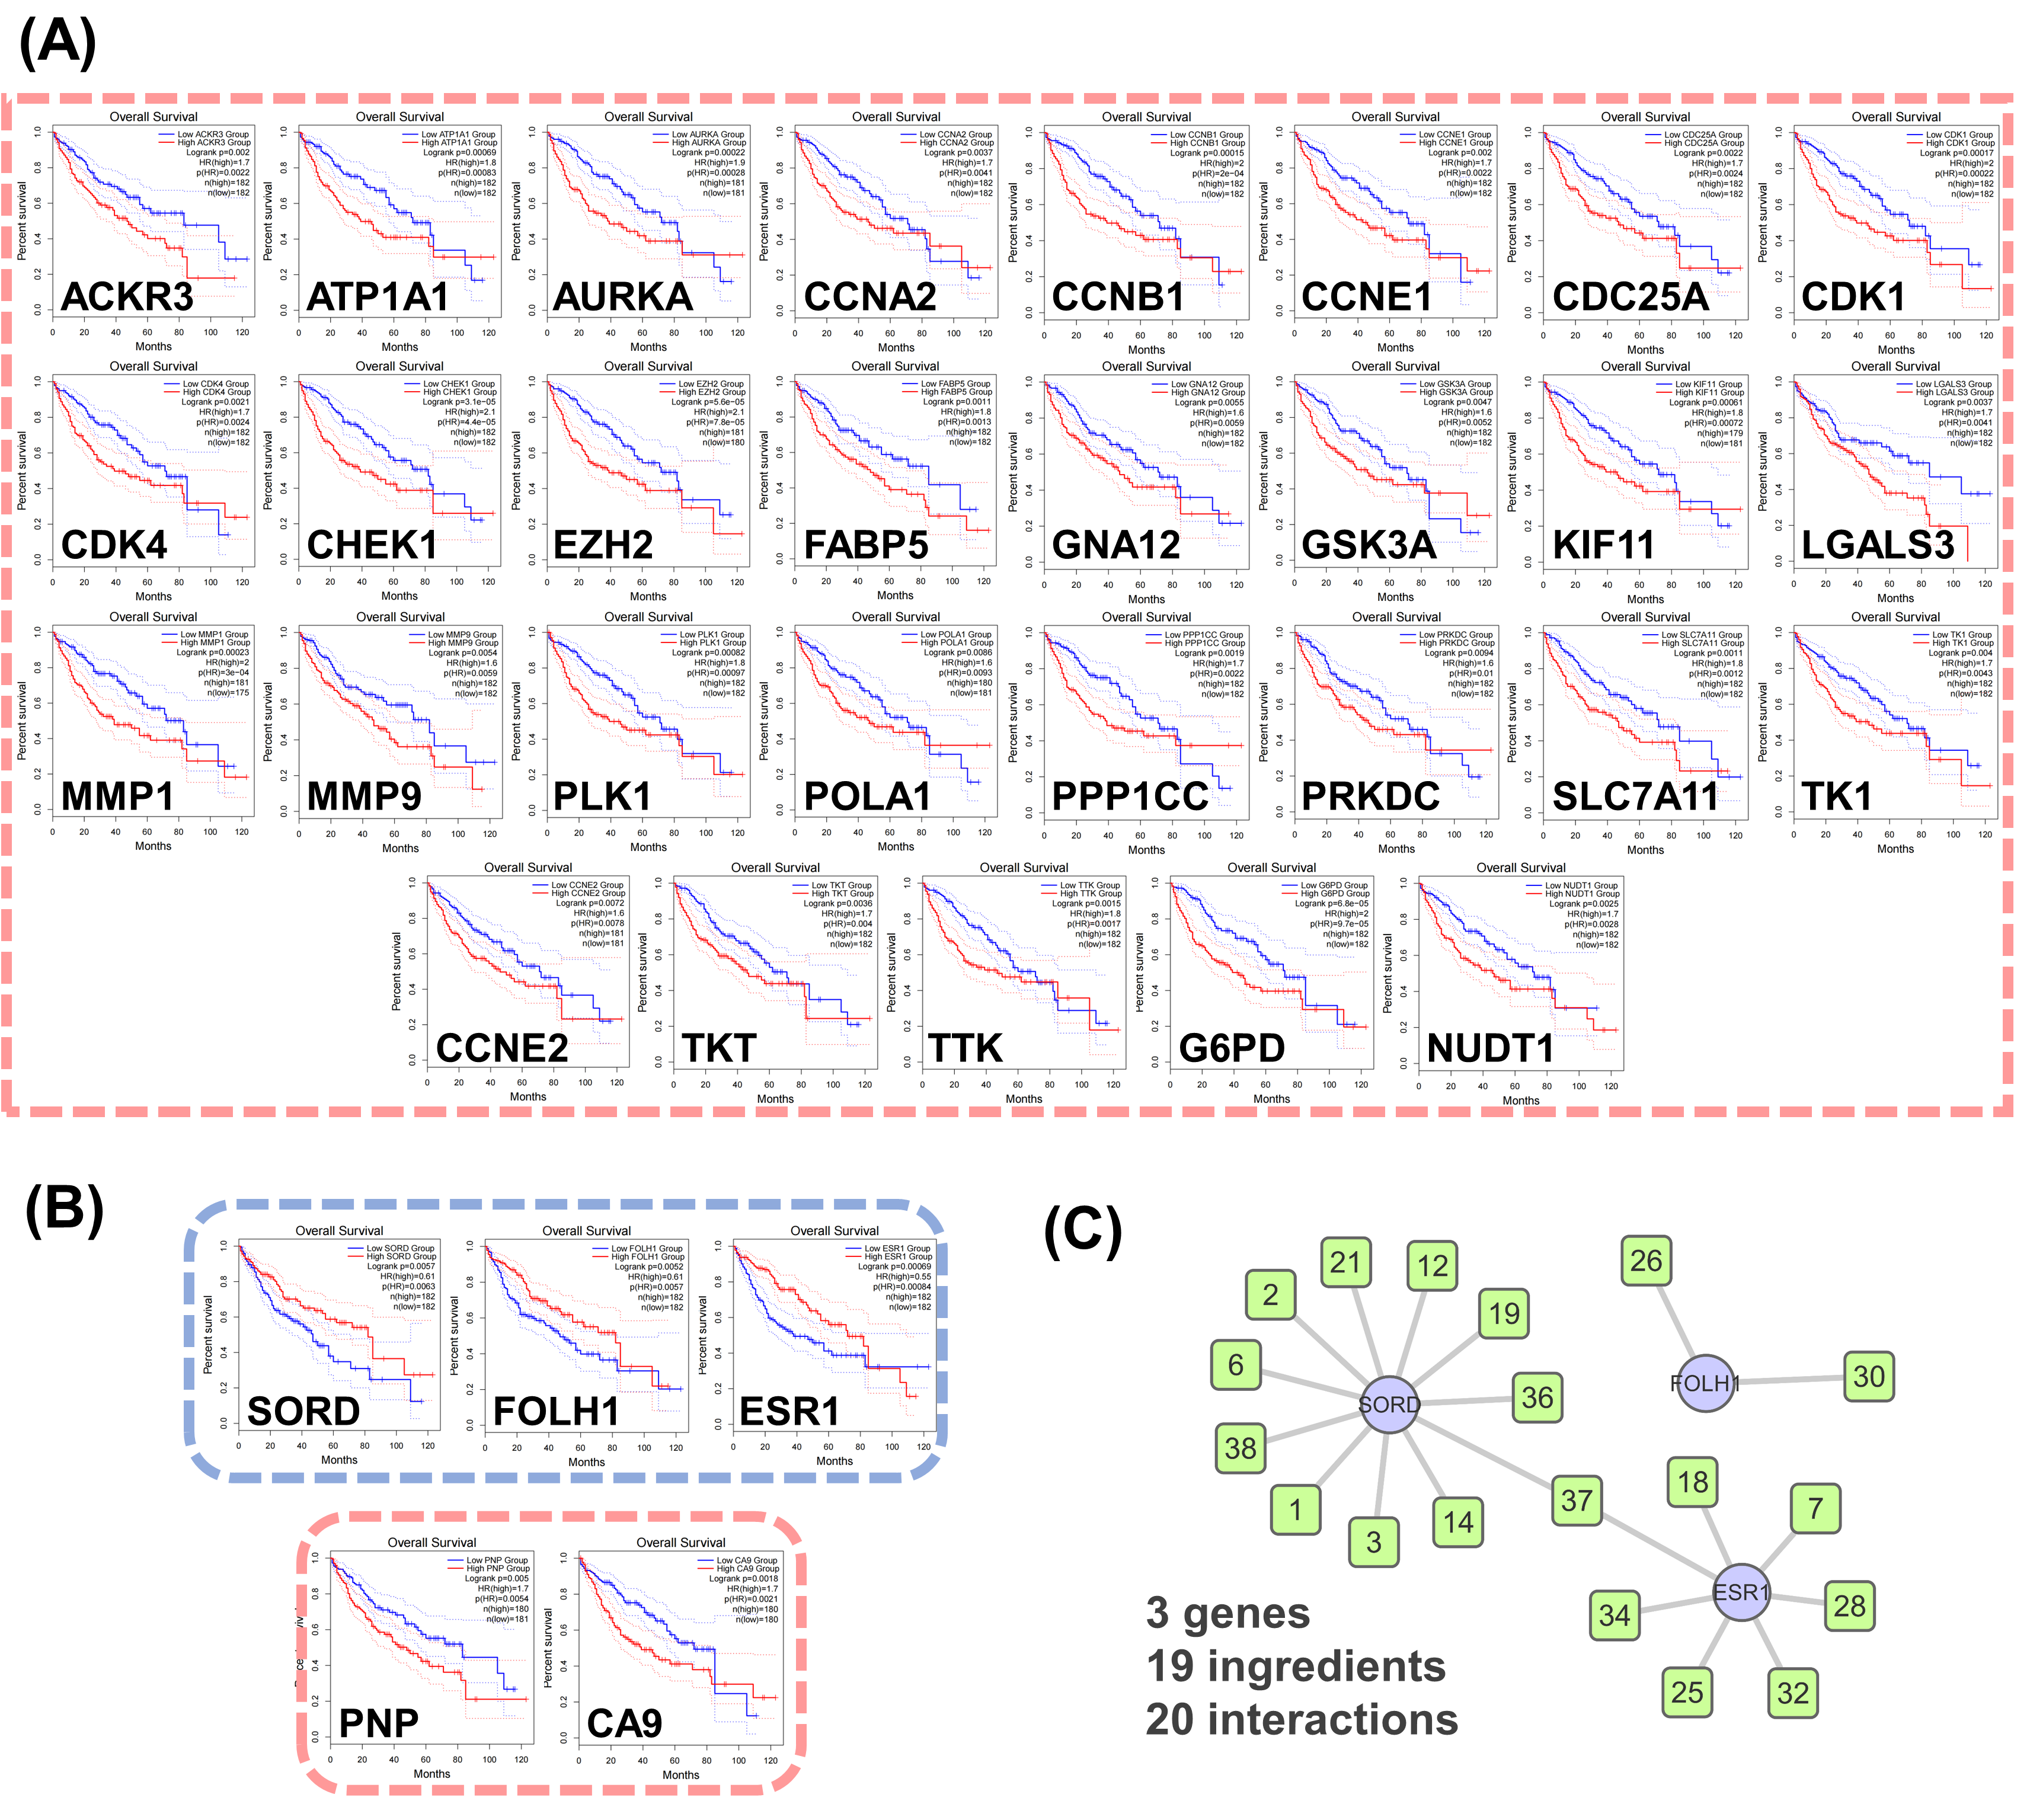
**

**Supplementary Figure 1.** Construction of prognostic target-ingredient network. **(A)** 29 genes with poor prognosis from the up-regulated group. **(B)** Three genes with good prognosis and two genes with poor prognosis from the down-regulated group. **(C)** The action network of targets with good prognosis and their related ingredients.


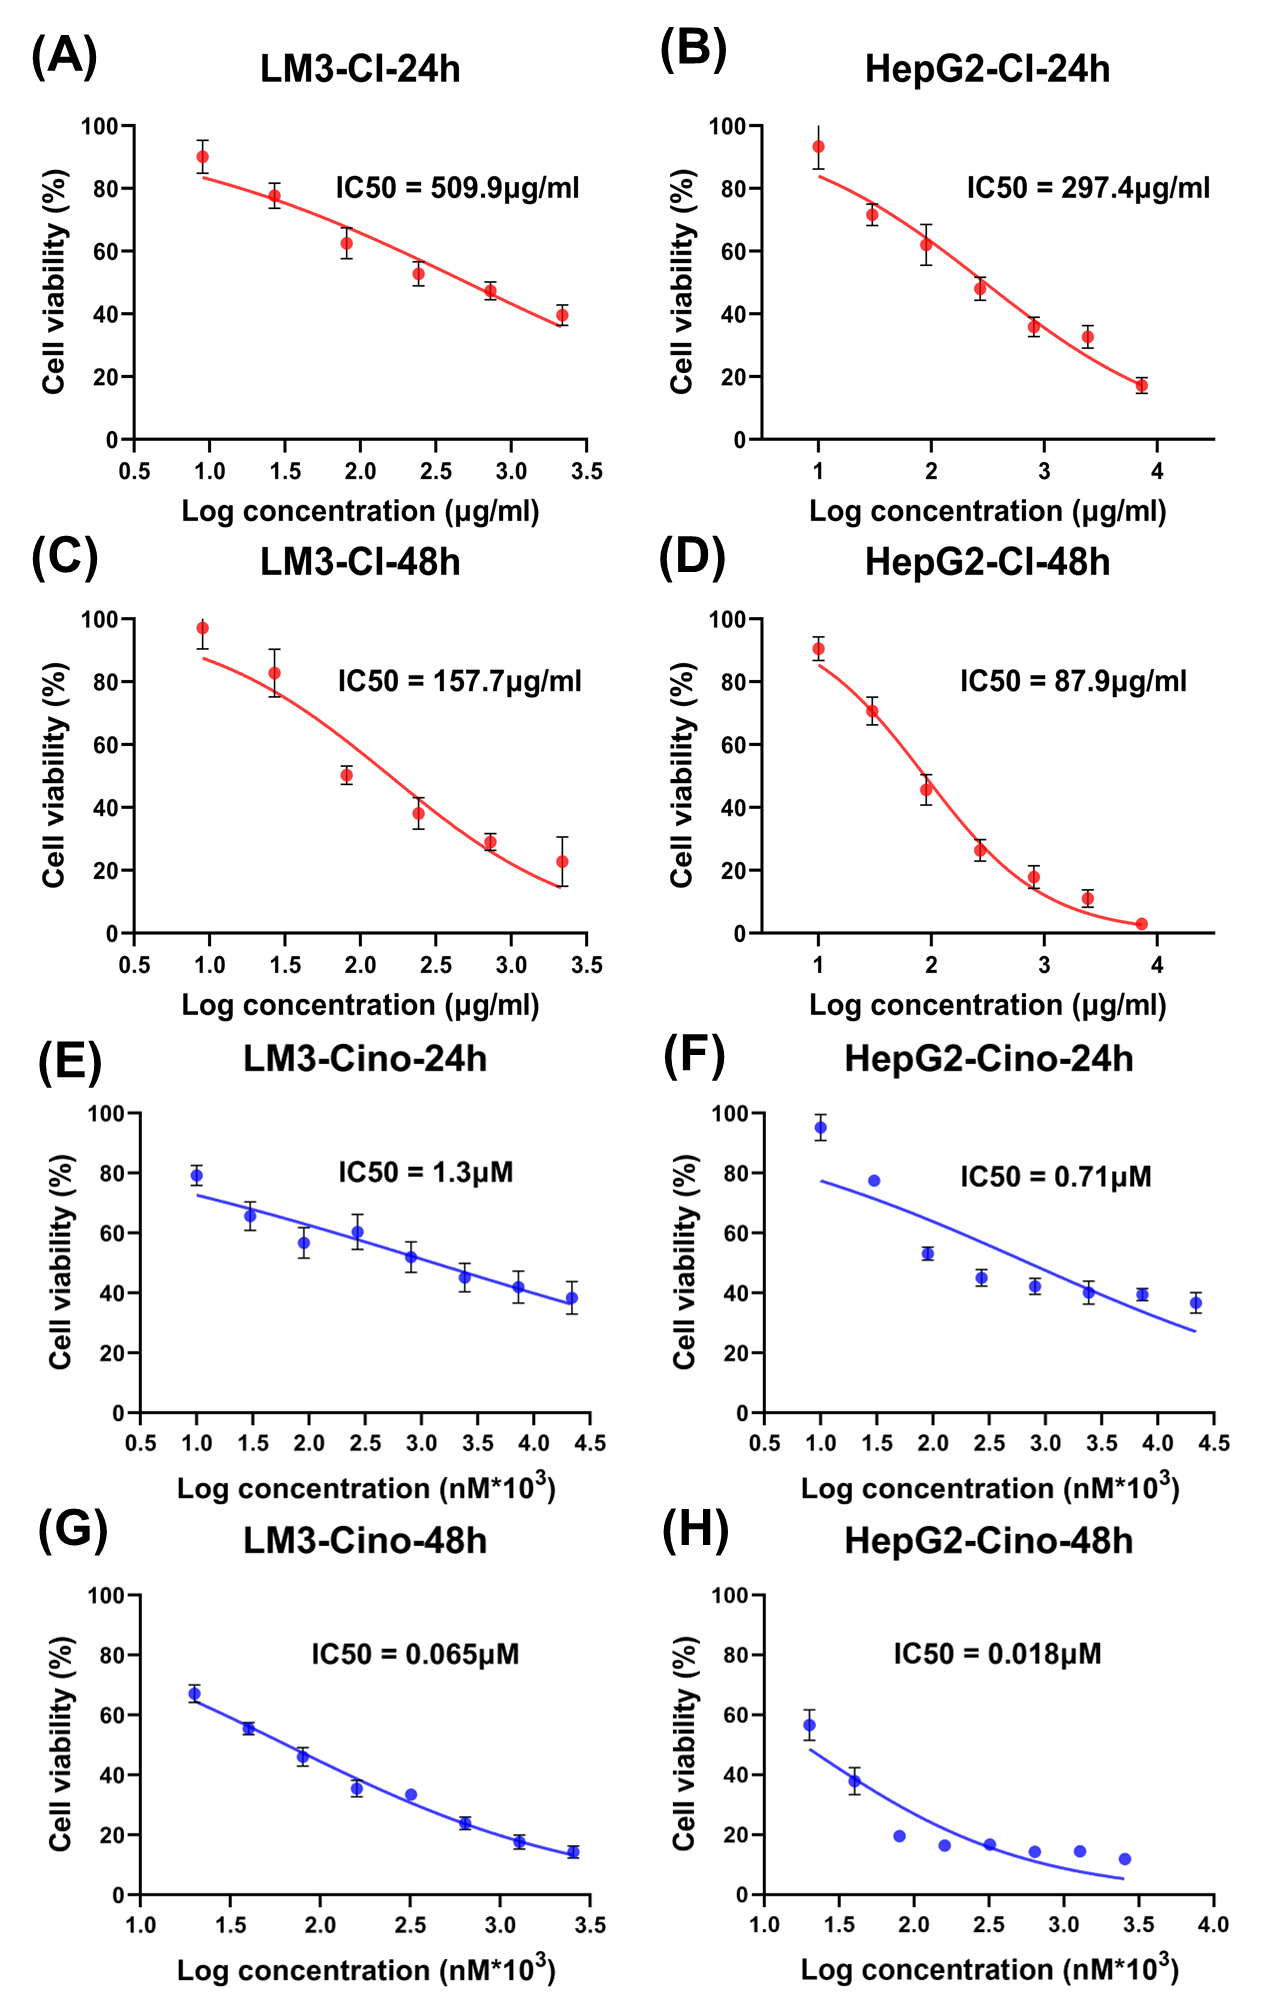


**Supplementary Figure 2.** Cytotoxicity test of hepatocellular carcinoma cell lines. **(A-D)** IC50 of 24 hours and 48 hours under different concentrations of CI treatment. **(E-H)** IC50 of 24 hours and 48 hours under different concentrations of Cinobufagin treatment.


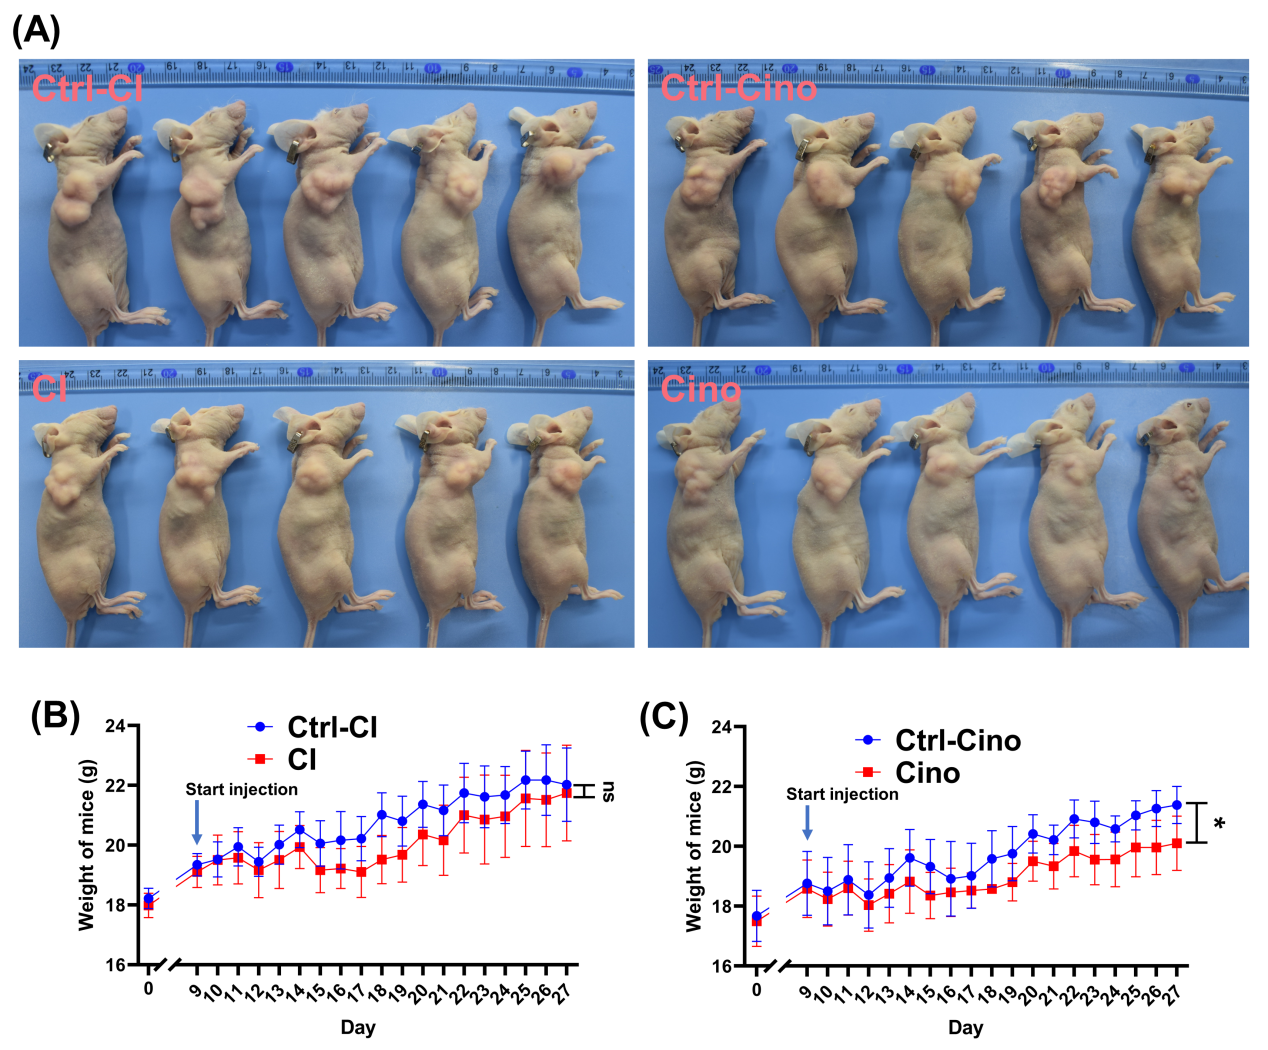


**Supplementary Figure 3.** Xenograft tumor models of nude mice in different treatment groups.

## Supplementary Tables

**Supplementary Table 1.** Statistics for 38 components. The first column is the component number. The second column is the compound name. The third column is the PubChem serial number. Four to six columns are listed as three topological methods for water-solubility evaluation of compounds, Solubility class (Log S scale): Insoluble (I) < -10 < Poorly (P) < -6 < Moderately (M) < -4 < Soluble (S) < -2 < Very (V) < 0 < Highly (H). The last column is listed as druglikeness evaluation, with a total of five indicators, and each indicator means "yes" or "no". The number represents the count of "yes" of the five metrics.

| No. | Ingredient_names | PubChem CID | Water Solubility Class | | | Druglikeness |
| --- | --- | --- | --- | --- | --- | --- |
| ESOL | Ali | SILICOS-IT |
| Ing1 | 12beta-Hydroxycinobufagin | 15513542 | S | M | M | 5 |
| Ing2 | 19-Hydroxydesacetylcinobufagin | 15513543 | S | S | S | 5 |
| Ing3 | 19-Oxodesacetylcinobufagin | 11144140 | S | S | S | 5 |
| Ing4 | 20S,21-Epoxyresibufogenin-3-formate | 101157014 | M | M | S | 5 |
| Ing5 | 3beta-Formyloxyresibufogenin | 10916635 | M | M | M | 5 |
| Ing6 | 5beta-Hydroxybufotalin | 15513540 | S | M | M | 5 |
| Ing7 | 6alpha-Hydroxycinobufagin | 10939450 | S | M | M | 5 |
| Ing8 | Racepinephrine hydrochloride | 5924 | V | V | S | 5 |
| Ing9 | Adrenaline | 838 | V | H | S | 4 |
| Ing10 | Arenobufagin | 12305198 | S | S | M | 5 |
| Ing11 | Bufalin | 9547215 | M | M | M | 5 |
| Ing12 | Bufarenogin | 167607 | S | S | M | 5 |
| Ing13 | Bufotalin | 12302120 | M | M | M | 5 |
| Ing14 | Bufotalinin | 11225 | S | S | M | 5 |
| Ing15 | Bufotenidine | 3083591 | S | S | M | 5 |
| Ing16 | Bufotenine | 10257 | S | S | S | 5 |
| Ing17 | N,N,N-Trimethylserotonin | 656705 | S | S | M | 5 |
| Ing18 | Cinobufagin | 11969542 | M | M | M | 5 |
| Ing19 | Cinobufaginol | 12303266 | S | M | M | 5 |
| Ing20 | Cinobufotalin | 259776 | S | M | M | 5 |
| Ing21 | Desacetylcinobufotalin | 15513544 | S | S | S | 5 |
| Ing22 | Gamabufotalin | 259803 | S | S | M | 5 |
| Ing23 | gamma-Aminobutyric acid | 119 | H | S | S | 3 |
| Ing24 | Marioside | 10411827 | S | S | S | 2 |
| Ing25 | Morphine | 5288826 | S | V | S | 5 |
| Ing26 | Morroniside | 11228693 | V | V | S | 1 |
| Ing27 | Resibufogenin | 6917974 | M | M | M | 5 |
| Ing28 | Serotonin | 5202 | S | S | S | 4 |
| Ing29 | Serpentine | 73391 | M | S | M | 5 |
| Ing30 | Suberic acid | 10457 | V | S | S | 4 |
| Ing31 | Suberogorgin | 57357334 | S | S | S | 5 |
| Ing32 | Telocinobufagin | 259991 | S | M | M | 5 |
| Ing33 | Tryptamine | 1150 | V | V | S | 4 |
| Ing34 | Tryptanthrin | 73549 | S | S | M | 5 |
| Ing35 | Hellebrigenol | 10432170 | S | S | M | 5 |
| Ing36 | Bufotalidin | 259577 | S | S | M | 5 |
| Ing37 | 19-Oxocinobufotalin | 102093790 | S | S | M | 5 |
| Ing38 | 19-Oxocinobufagin | 102093791 | S | S | M | 5 |

**Supplementary Table 2.** Statistics for 34 prognostic related targets. The first column is the target-related gene name. The second column is the expression grouping, "Up" is the high expression group, and "Down" is the low expression group. The third column is the prognosis grouping. The fourth column is Hazard Ratio (HR), which is used to evaluate the prognosis of the gene. The fifth column shows the *P* value, and the *P* value of all targets is 0.01 or less. In the sixth and seventh columns, "yes" or "no" indicates whether or not the gene belongs to a cell cycle pathway or 15 hub genes.

| Gene | Group | Prognosis | HR | p(HR) | Cell cycle | Hub genes |
| --- | --- | --- | --- | --- | --- | --- |
|
| SORD | Down | Good | 0.61 | 6.3E-03 | no | no |
| FOLH1 | Down | Good | 0.61 | 5.7E-03 | no | no |
| ESR1 | Down | Good | 0.55 | 8.4E-04 | no | no |
| PNP | Down | Poor | 1.7 | 5.4E-03 | no | no |
| CA9 | Down | Poor | 1.7 | 2.1E-03 | no | no |
| ACKR3 | Up | Poor | 1.7 | 2.2E-03 | no | no |
| ATP1A1 | Up | Poor | 1.8 | 8.3E-04 | no | no |
| AURKA | Up | Poor | 1.9 | 2.8E-04 | no | yes |
| CCNA2 | Up | Poor | 1.7 | 4.1E-03 | yes | yes |
| CCNB1 | Up | Poor | 2 | 2.0E-04 | yes | yes |
| CCNE1 | Up | Poor | 1.7 | 2.2E-03 | yes | yes |
| CDC25A | Up | Poor | 1.7 | 2.4E-03 | yes | yes |
| CDK1 | Up | Poor | 2 | 2.2E-04 | yes | yes |
| CDK4 | Up | Poor | 1.7 | 2.4E-03 | yes | yes |
| CHEK1 | Up | Poor | 2.1 | 4.4E-05 | yes | yes |
| EZH2 | Up | Poor | 2.1 | 7.8E-05 | no | no |
| FABP5 | Up | Poor | 1.8 | 1.3E-03 | no | no |
| GNA12 | Up | Poor | 1.6 | 5.9E-03 | no | no |
| GSK3A | Up | Poor | 1.6 | 5.2E-03 | no | no |
| KIF11 | Up | Poor | 1.8 | 7.2E-04 | no | yes |
| LGALS3 | Up | Poor | 1.7 | 4.1E-03 | no | no |
| MMP1 | Up | Poor | 2 | 3.0E-04 | no | no |
| MMP9 | Up | Poor | 1.6 | 5.9E-03 | no | no |
| PLK1 | Up | Poor | 1.8 | 9.7E-04 | yes | yes |
| POLA1 | Up | Poor | 1.6 | 9.3E-03 | no | no |
| PPP1CC | Up | Poor | 1.7 | 2.2E-03 | no | no |
| PRKDC | Up | Poor | 1.6 | 1.0E-02 | yes | no |
| SLC7A11 | Up | Poor | 1.8 | 1.2E-03 | no | no |
| TK1 | Up | Poor | 1.7 | 4.3E-03 | no | no |
| CCNE2 | Up | Poor | 1.6 | 7.8E-03 | yes | yes |
| TKT | Up | Poor | 1.7 | 4.0E-03 | no | no |
| TTK | Up | Poor | 1.8 | 1.7E-03 | yes | yes |
| G6PD | Up | Poor | 2 | 9.7E-05 | no | no |
| NUDT1 | Up | Poor | 1.7 | 2.8E-03 | no | no |

**Supplementary Table 3.** Parameters related to molecular docking by Autodock Vina.

| **Receptor** | **PDB_ID** | **Ligand** | **center_x** | **center_y** | **center_z** | **size_x** | **size_y** | **size_z** |
| --- | --- | --- | --- | --- | --- | --- | --- | --- |
| CDK1 | 4Y72 | ex_ligand | 30.317 | -72.137 | 184.638 | 11.628 | 10.111 | 10.617 |
| Ingredients | 23.684 | -67.342 | 186.194 | 20.000 | 20.000 | 16.000 |
| CDK4 | 7SJ3 | ex_ligand | 12.440 | -39.381 | 10.040 | 15.000 | 9.750 | 10.500 |
| Ingredients | 13.308 | -39.381 | 10.040 | 19.500 | 15.750 | 15.000 |
| PLK1 | 3THB | ex_ligand | -44.473 | 10.395 | 10.256 | 8.000 | 12.000 | 9.000 |
| Ingredients | -43.438 | 10.395 | 11.963 | 12.000 | 16.000 | 16.000 |
| CHEK1 | 2HOG | ex_ligand | 16.987 | -2.482 | 9.861 | 16.139 | 9.222 | 9.683 |
| Ingredients | 12.185 | -0.107 | 17.246 | 23.550 | 17.444 | 25.294 |
| TTK | 5N84 | ex_ligand | 37.397 | 42.329 | 39.534 | 8.500 | 14.000 | 9.000 |
| Ingredients | 39.164 | 37.126 | 35.911 | 17.444 | 17.444 | 20.933 |
